# Supplementary material for: Recombinant Human Erythropoietin in Amyotrophic Lateral Sclerosis: A Pilot Study of Safety and Feasibility
Source: PubMed Central journal article supplement — J Clin Neurol. 2014 Oct 6;10(4):342–7. doi: 10.3988/jcn.2014.10.4.342 (PMC4198716; doi:10.3988/jcn.2014.10.4.342), 2014-10-06
Supplement: jcn-10-342-s001.pdf [file jcn-10-342-s001.pdf]

**Supplementary Table 1. Patient and clinical data in study I**

| Patient no. | Sex/age (years) | Symptom duration (months) | Bulbar or limb onset | ALSFRS-R score, month |    |    |    | Hemoglobin (g/dL), month |      |      |      | Platelet count ( $\times 10^9/\mu\text{L}$ ), month |     |     |     |
|-------------|-----------------|---------------------------|----------------------|-----------------------|----|----|----|--------------------------|------|------|------|-----------------------------------------------------|-----|-----|-----|
|             |                 |                           |                      | -3                    | 0  | 3  | 6  | 0                        | 1    | 2    | 3    | 0                                                   | 1   | 2   | 3   |
| 1           | F/39            | 35                        | Limb:leg             | 34                    | 34 | 34 | 34 | 12.5                     | 12.5 | 11.7 | 12.3 | 321                                                 | 292 | 303 | 270 |
| 2           | F/67            | 30                        | Limb:arm             | 31                    | 31 | 29 | 26 | 11.7                     | 12.2 | 12.2 | 12.8 | 219                                                 | 217 | 228 | 228 |
| 3           | M/45            | 19                        | Limb:leg             | 42                    | 40 | 38 | 36 | 15.1                     | 14.7 | 15.7 | 15.9 | 255                                                 | 236 | 235 | 279 |
| 4           | M/63            | 29                        | Limb:leg             | 46                    | 45 | 39 | 34 | 15.6                     | 15.0 | 15.1 | 15.7 | 226                                                 | 185 | 190 | 217 |
| 5           | M/57            | 24                        | Bulbar               | 41                    | 36 | 34 | 30 | 12.3                     | 12.4 | 13.0 | 13.0 | 171                                                 | 173 | 108 | 207 |
| 6           | M/65            | 10                        | Limb:arm             | 40                    | 32 | 27 | 21 | 14.5                     | 14.7 | 15.2 | 14.9 | 186                                                 | 185 | 143 | 186 |
| 7           | M/71            | 11                        | Limb:leg             | 34                    | 26 | 22 | 16 | 13.0                     | 13.5 | 14.2 | 14.6 | 85                                                  | 75  | 84  | 89  |
| 8           | M/55            | 19                        | Bulbar               | 40                    | 36 | 32 | 28 | 15.4                     | 14.7 | 14.1 | 16.0 | 239                                                 | 236 | 242 | 237 |
| 9           | M/41            | 11                        | Limb:leg             | 40                    | 37 | 34 | 31 | 13.1                     | 13.6 | 13.6 | 12.9 | 282                                                 | 272 | 281 | 278 |
| 10          | M/42            | 20                        | Bulbar               | 34                    | 34 | 34 | 34 | 14.5                     | 13.7 | 14.2 | 15.7 | 233                                                 | 240 | 222 | 248 |
| 11          | M/57            | 18                        | Limb:arm             | 48                    | 30 | 28 | 23 | 13.9                     | 14.3 | 13.8 | 14.1 | 199                                                 | 211 | 198 | 225 |
| 12          | F/52            | 10                        | Limb:arm             | 45                    | 40 | 36 | 31 | 12.3                     | 12.3 | 11.8 | 13.5 | 201                                                 | 201 | 181 | 203 |
| 13          | M/69            | 11                        | Limb:arm             | 45                    | 42 | 41 | 38 | 13.1                     | 14.1 | 14.6 | 14.4 | 264                                                 | 283 | 271 | 263 |
| 14          | M/65            | 25                        | Limb:arm             | 37                    | 32 | 29 | 25 | 13.0                     | 13.0 | 13.3 | 13.1 | 261                                                 | 252 | 379 | 365 |
| 15          | F/45            | 27                        | Limb:leg             | 34                    | 30 | 29 | 24 | 12.9                     | 13.2 | 12.7 | 12.7 | 242                                                 | 253 | 259 | 268 |
| 16          | F/52            | 6                         | Bulbar               | 46                    | 45 | 44 | 43 | 13.4                     | 14.1 | 14.0 | 13.3 | 207                                                 | 283 | 199 | 194 |
| 17          | F/48            | 10                        | Bulbar               | 45                    | 39 | 33 | 27 | 13.1                     | 12.8 | 13.6 | 13.8 | 230                                                 | 259 | 264 | 238 |
| 18          | F/50            | 19                        | Bulbar               | 39                    | 34 | 30 | 24 | 13.3                     | 12.5 | 12.7 | 11.9 | 235                                                 | 238 | 234 | 242 |
| 19          | M/41            | 30                        | Limb:leg             | 35                    | 35 | 35 | 35 | 14.0                     | 14.8 | 14.0 | 14.6 | 243                                                 | 237 | 193 | 205 |
| 20          | M/49            | 21                        | Bulbar               | 37                    | 32 | 29 | 25 | 15.1                     | 14.8 | 15.8 | 16.5 | 194                                                 | 224 | 208 | 224 |
| 21          | M/73            | 11                        | Bulbar               | 34                    | 34 | 34 | 34 | 13.5                     | 13.8 | 14.3 | 15.9 | 285                                                 | 268 | 258 | 265 |
| 22          | F/67            | 13                        | Limb:leg             | 31                    | 24 | 20 | 15 | 14.0                     | 13.9 | 13.0 | 11.6 | 142                                                 | 126 | 124 | 150 |
| 23          | M/53            | 18                        | Limb:arm             | 31                    | 28 | 25 | 22 | 14.8                     | 15.5 | 15.9 | 15.6 | 223                                                 | 208 | 168 | 201 |
| 24          | M/68            | 18                        | Limb:arm             | 35                    | 33 | 30 | 27 | 13.4                     | 14.4 | 15.1 | 14.3 | 165                                                 | 175 | 179 | 193 |
| 25          | F/56            | 20                        | Limb:leg             | 34                    | 30 | 27 | 24 | 13.3                     | 12.7 | 12.6 | 10.7 | 268                                                 | 295 | 283 | 271 |
| 26          | M39             | 23                        | Limb:arm             | 29                    | 23 | 22 | 17 | 13.6                     | 13.6 | 12.7 | 13.2 | 329                                                 | 315 | 267 | 285 |

ALSFRS-R: amyotrophic lateral sclerosis Functional Rating Scale-Revised, F: female, M: male.
