# Supplementary material for: Recombinant Human Erythropoietin in Amyotrophic Lateral Sclerosis: A Pilot Study of Safety and Feasibility
Source: PubMed Central journal article supplement — J Clin Neurol. 2014 Oct 6;10(4):342–7. doi: 10.3988/jcn.2014.10.4.342 (PMC4198716; doi:10.3988/jcn.2014.10.4.342), 2014-10-06
Supplement: jcn-10-342-s002.pdf [file jcn-10-342-s002.pdf]

**Supplementary Table 2.** Follow-up laboratory data for the safety assessment in study II

|                                       | Month      |            |            |            |            |            |            | p    |
|---------------------------------------|------------|------------|------------|------------|------------|------------|------------|------|
|                                       | 0          | 1          | 2          | 3          | 4          | 5          | 6          |      |
| Hemoglobin (g/dL)                     | 13.4±1.3   | 13.6±1.3   | 13.7±1.2   | 13.6±1.3   | 13.6±1.3   | 13.9±1.3   | 13.7±1.4   | 0.42 |
| Hematocrit (%)                        | 40.2±4.2   | 41.0±4.1   | 41.4±3.7   | 40.7±3.5   | 41.0±3.8   | 42.1±3.5   | 42.0±3.4   | 0.86 |
| Platelet count (×10 <sup>3</sup> /μL) | 218.0±50.2 | 220.7±45.7 | 212.1±50.5 | 217.9±46.7 | 231.3±59.0 | 227.7±48.6 | 234.0±67.5 | 0.97 |
| ALT (U/L)                             | 30.2±15.0  | 30.2±17.2  | 35.2±24.6  | 31.5±16.9  | 32.2±17.1  | 31.7±12.7  | 31.8±12.4  | 0.96 |
| AST (U/L)                             | 29.2±22.6  | 26.6±9.7   | 29.0±11.4  | 28.4±9.3   | 27.6±10.8  | 26.4±5.9   | 29.0±13.2  | 0.99 |
| Blood urea nitrogen (mg/dL)           | 14.4±2.8   | 14.9±4.3   | 15.4±4.1   | 15.9±4.2   | 16.2±3.3   | 16.1±4.4   | 17.0±4.4   | 0.81 |
| Creatinine (mg/dL)                    | 0.7±0.1    | 0.7±0.1    | 0.7±0.1    | 0.7±0.1    | 0.6±0.1    | 0.6±0.1    | 0.6±0.1    | 0.8  |
| Mean blood pressure (mm Hg)           | 97.4±6.3   | 98.2±7.6   | 89.0±8.0   | 93.1±7.9   | 85.6±9.5   | 95.4±7.2   | 92.5±8.1   | 0.81 |

Data are mean±SD values.

ALT: alanine transaminase, AST: aspartate transaminase.
